# Supplementary material for: Novel Quinazolinone MJ-29 Triggers Endoplasmic Reticulum Stress and Intrinsic Apoptosis in Murine Leukemia WEHI-3 Cells and Inhibits Leukemic Mice
Source: PubMed Central journal article supplement (PMC3360742; doi:10.1371/journal.pone.0036831), 2012-05-25
Supplement: pone.0036831.s005.pdf [file pone.0036831.s005.pdf]

**Table S1.** Blood biochemical profiles in the BALB/c mice with or without WEHI-3 cells by intravein transplantation following treatment of MJ-29 by intraperitoneal injection

| Item <sup>a,b</sup> | Control      | WEHI-3       | WEHI-3/MJ-29 |              |
|---------------------|--------------|--------------|--------------|--------------|
|                     |              |              | 10 mg/kg     | 20 mg/kg     |
| ALB (g/dL)          | 2.95±0.07    | 2.50±0.03    | 2.60±0.04    | 2.50±0.06    |
| ALT (U/L)           | 110.00±5.66  | 126.00±17.79 | 81.00±14.91  | 100.00±16.45 |
| AST (U/L)           | 215.50±14.85 | 249.00±12.51 | 200.70±17.78 | 230.00±21.45 |
| BUN (mg/dL)         | 21.35±0.92   | 21.30±1.02   | 19.40±1.78   | 22.50±1.27   |
| CREA (mg/dL)        | 0.48±0.04    | 0.59±0.10    | 0.46±0.09    | 0.37±0.17    |
| GLU (mg/dL)         | 177.50±6.36  | 162.00±7.68  | 158.70±8.87  | 166.58±6.36  |
| LDH (U/L)           | 296.00±26.87 | 356.80±62.45 | 259.00±31.13 | 295.30±45.81 |
| TP (g/dL)           | 4.95±0.21    | 4.40±0.17    | 4.20±0.14    | 4.20±0.20    |
| UA (mg/dL)          | 2.05±0.07    | 1.70±0.09    | 3.70±0.11    | 3.60±0.12    |

<sup>a</sup>ALB, albumin; ALT, alanine transaminase; AST, aspartate transaminase; BUN, blood urea nitrogen; CREA, creatinine; GLU, glucose; LDH, lactate dehydrogenase; TP, total protein; UA, uric acid

<sup>b</sup>Values represent as mean ± S.D. from at least five samples per group
